# Supplementary material
Source: publisher figshare collection journal article supplement (https://frontiersin.figshare.com/ndownloader/files/18722189)

# Plant regeneration via somatic embryogenesis in mature wild olive genotypes resistant to the defoliating pathotype of *Verticillium dahliae*

Narváez, I., Martín, C., Jiménez-Díaz, R.M., Mercado, J.A., Pliego-Alfaro, F.

## Supplementary material

**Supplementary Fig. 1.** Material of StopVert genotype used in this study (A-B) Donor plant in the greenhouse. (C) *In vitro* grown shoot originally derived from axillary buds of donor plant used as explant source. Bar in C corresponds to 1 cm.

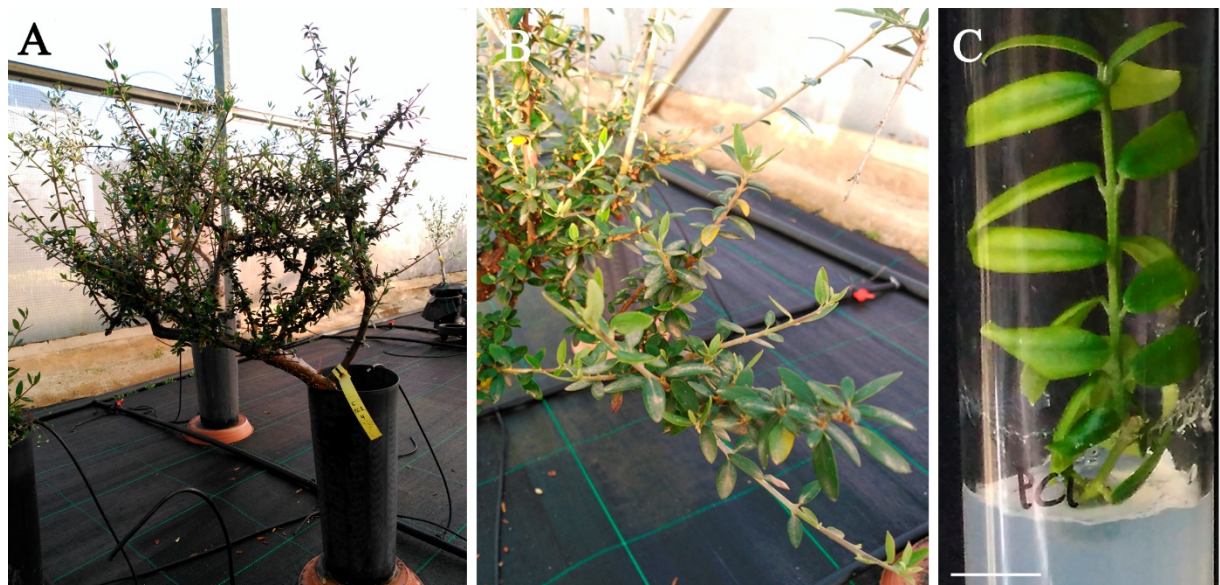

**Supplementary Fig. 2.** Arbitrary scale based on visual criteria used to estimate the amount of callus formed on basal part of leaves after 4 weeks on basal  $\frac{1}{2}$  MS medium. From left to right: initial explant; (1) < 40% explant surface covered by callus; (2) 40-80% explant surface covered by callus; (3) 80-100% explant surface covered by callus. Bars correspond to 0.5 cm.

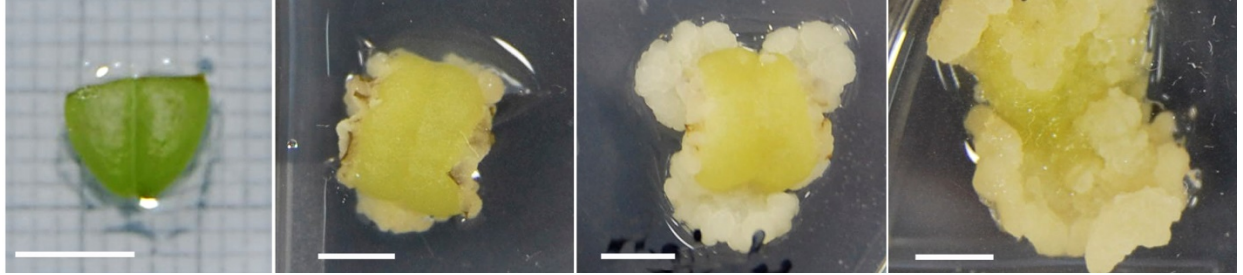

Supplement: Supplementary file [file 18722189]
